# American Neuropsychiatric Association

The American Neuropsychiatric Association (ANPA), established in 1988, is an organization of professionals in neuropsychiatry, behavioral neurology, neuropsychology and the clinical neurosciences. Our mission is to improve the lives of people with disorders at the interface of psychiatry and neurology.

The strength of the organization is our diversity of membership, which is comprised of professionals all areas of neuroscience who share clinical and/or academic interests in neuropsychiatry. The interdisciplinary nature of the membership encourages collaboration among educators, clinicians, researchers, students and trainees in research presentations, symposia, workshops and/or continuing education courses. *The Journal of Neuropsychiatry and Clinical Neurosciences (JNCN)* is the official publication of the organization, and is a benefit of membership.

ANPA holds an annual scientific meeting and provides up to 30 CME/CE credits. Members are encouraged to submit their work for presentation at these annual meetings. Travel awards are available for promising young investigators. Annual meeting abstracts and proceedings are published in *JNCN*.

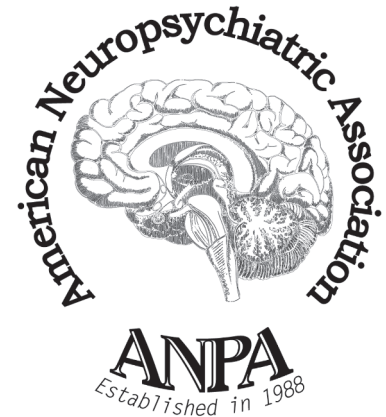

## Contact Information

### Benefits of Membership

- Subscription to *The Journal of Neuropsychiatry and Clinical Neurosciences (JNCN)*
- Discount on subscriptions to PsychiatryOnline.com including DSM Premium and DSM Premium Plus
- Opportunity for presentation at the annual meeting with accepted abstracts published in the *JNCN*
- Significantly reduced registration fees at the annual meeting
- Newsletters, news updates, information on job and training opportunities, research and meeting information on the ANPA web site: [www.anpaonline.org](http://www.anpaonline.org)
- Discounted membership and meeting registration fees for trainees
- Collaboration in clinical, educational and research activities and the opportunity to interact with senior colleagues
- Opportunity to participate on committees and in the future leadership of ANPA
- Opportunity to participate in on-line forums for discussion of research, clinical cases and/or current issues related to neuropsychiatric practice
- Opportunity to join Special Interest Groups for members who have common interests in specific research, clinical cases, practice issues or educational areas

Website:  
[www.anpaonline.org](http://www.anpaonline.org)

Email:  
[anpa@osu.edu](mailto:anpa@osu.edu)

Phone:  
614-447-2077

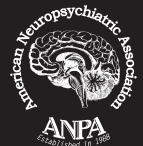

## Join ANPA Now!

**Don't miss ANPA's 22<sup>nd</sup>  
Annual Meeting**

**The Westin Tabor Center  
Denver, Colorado  
March 23-26, 2011**

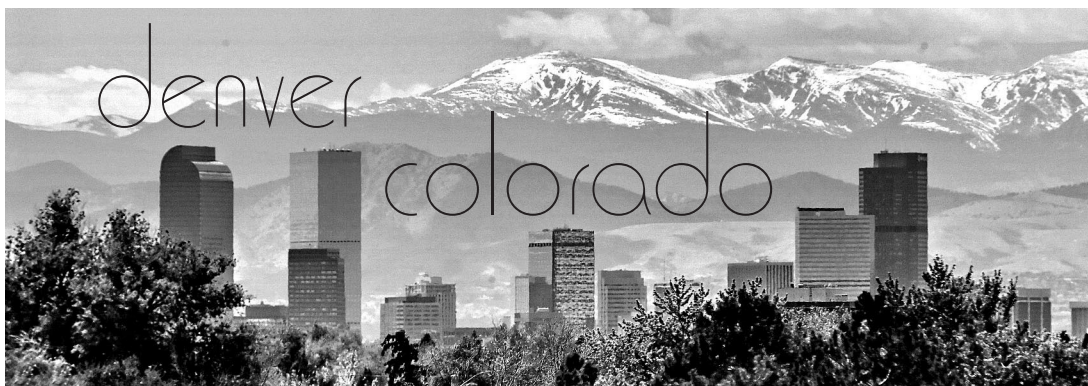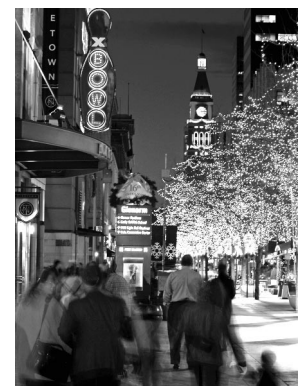

Join online at: [www.anpaonline.org](http://www.anpaonline.org)

22<sup>nd</sup> annual meeting

# American Neuropsychiatric Association

meeting announcement &  
call for abstracts

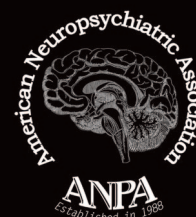

# denver

Abstracts presented at the meeting will be published on-line in the spring 2011 issue of the *Journal of Neuropsychiatry and Clinical Neurosciences*.

Travel awards may be given to one or more of the young investigators submitting the most promising abstracts.

**Deadline for receipt of abstracts is November 3, 2010.**

Complete submission instructions will be available July 15, 2010 at: [www.anpaonline.org](http://www.anpaonline.org)

Meeting information can be found on the ANPA web site: [www.anpaonline.org](http://www.anpaonline.org) as it becomes available.

# March 23-26, 2011

**The Westin Tabor Center**

**You are invited to submit abstracts reporting new research or challenging clinical cases for poster or platform presentations.**

For more information contact the American Neuropsychiatric Association office:  
700 Ackerman Road, Suite 625 • Columbus, Ohio USA 43202 • Phone: 614-447-2077 • E-mail: [anpa@osu.edu](mailto:anpa@osu.edu)
