# THE JOURNAL OF NEUROPSYCHIATRY and Clinical Neurosciences

The Official Journal of the American Neuropsychiatric Association

## In this issue:

- Psychopharmacological Neuroprotection in Neurodegenerative Disease: Heuristic Clinical Applications
- APOE  $\epsilon 4$  and Cognitive Dysfunction in Multiple Sclerosis: A Review
- Neuropsychiatric Symptoms in Dementia Patients With and Without a History of Traumatic Brain Injury
- Suicide in Patients With Stroke: A Population-Based Study of Suicide Victims During the Years 1988-2007 in Northern Finland
- The Impact of Antidepressant Treatment on Cognitive Functioning in Depressed Patients With Parkinson's Disease

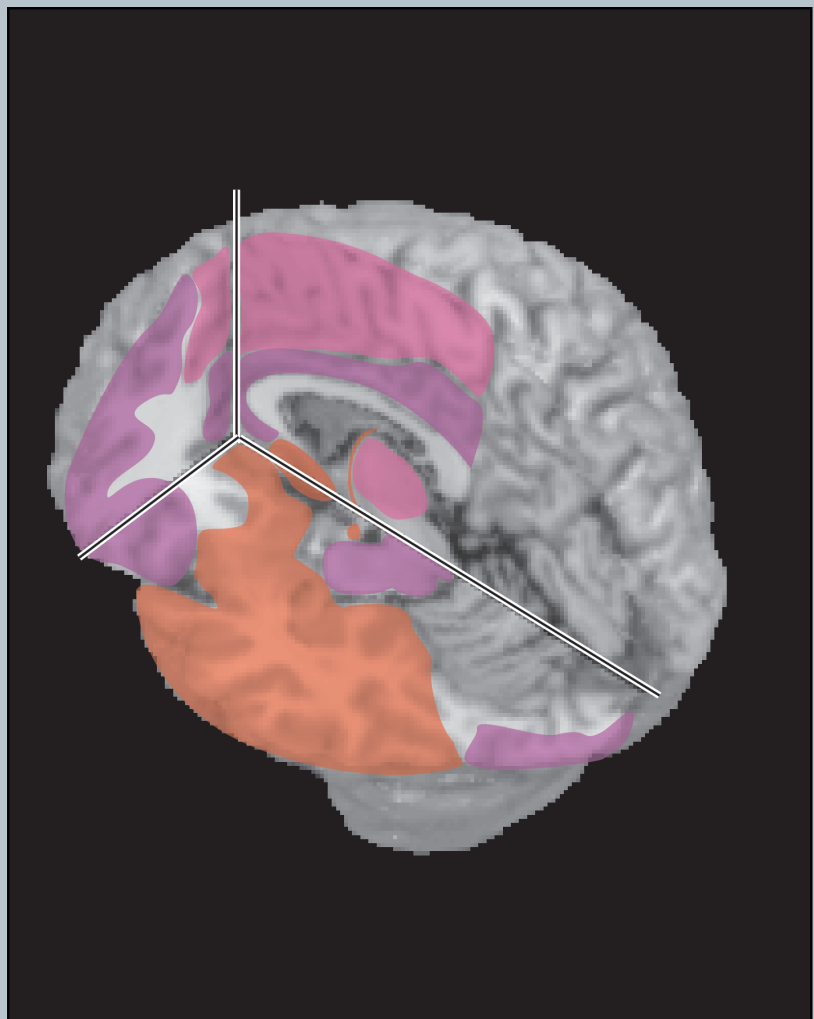

Source: https://neuro.psychiatryonline.org/doi/suppl/10.1176/jnp.2010.22.issue-2/suppl_file/cover.pdf
