# The *NEW* [www.appi.org](http://www.appi.org) makes its debut! *visit today*

## The new [www.appi.org](http://www.appi.org) offers:

- Special Discounts for American Psychiatric Association Members and Members-in-Training
- Detailed descriptions on more than 700 titles plus subscription products
- **My Account** history with order and tracking information
- Fast and easy navigation
- Enhanced search engine

The screenshot displays the homepage of the American Psychiatric Publishing, Inc. website. At the top, there is a navigation bar with links for 'Disorders', 'Subjects', 'Assessment & Treatment', 'Guides, References & Manuals', 'Books', 'Journals', and 'eContent'. A search bar is prominently featured with a 'Go' button and a link to 'Advanced Search'. Below the navigation, the page is divided into several sections: 'Featured Titles' showcasing 'Long-Term Psychodynamic Psychotherapy' by Glen O. Gabbard, M.D.; 'psychiatryonline' with a link to 'psychiatryonline.com'; 'Featured Author' highlighting Glen O. Gabbard, M.D.; 'Explore the DSM Library' featuring the 'DIAGNOSTIC AND STATISTICAL MANUAL OF MENTAL DISORDERS'; and 'Discover the Journals of American Psychiatric Publishing' with images of 'PSYCHIATRIC SERVICES' and 'FOCUS' journals. On the right side, there are sections for 'Resources' (listing various user groups like APA Members and Librarians) and 'Search Books' powered by Google. A 'Subscribe' section at the bottom right encourages users to sign up for the APPI Newsletter. The footer contains copyright information for 2010 and contact details for American Psychiatric Publishing, Inc.

**Special Discount for Members:**  
**15% Discount** for APA Members  
**30% Discount** for APA Members-in-Training

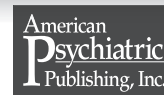

The *First* and *Last* Word in Psychiatry

American Psychiatric Publishing, Inc.  
[appi@psych.org](mailto:appi@psych.org) • 1-800-368-5777 • 703-907-7322
